# Supplementary material for: The role of obesity in female reproductive conditions: A Mendelian Randomisation study
Source: bioRxiv or medRxiv preprint supplement (doi:10.1101/2021.06.01.21257781), 2021-06-01
Supplement: Supplementary file [file media-3.pdf]

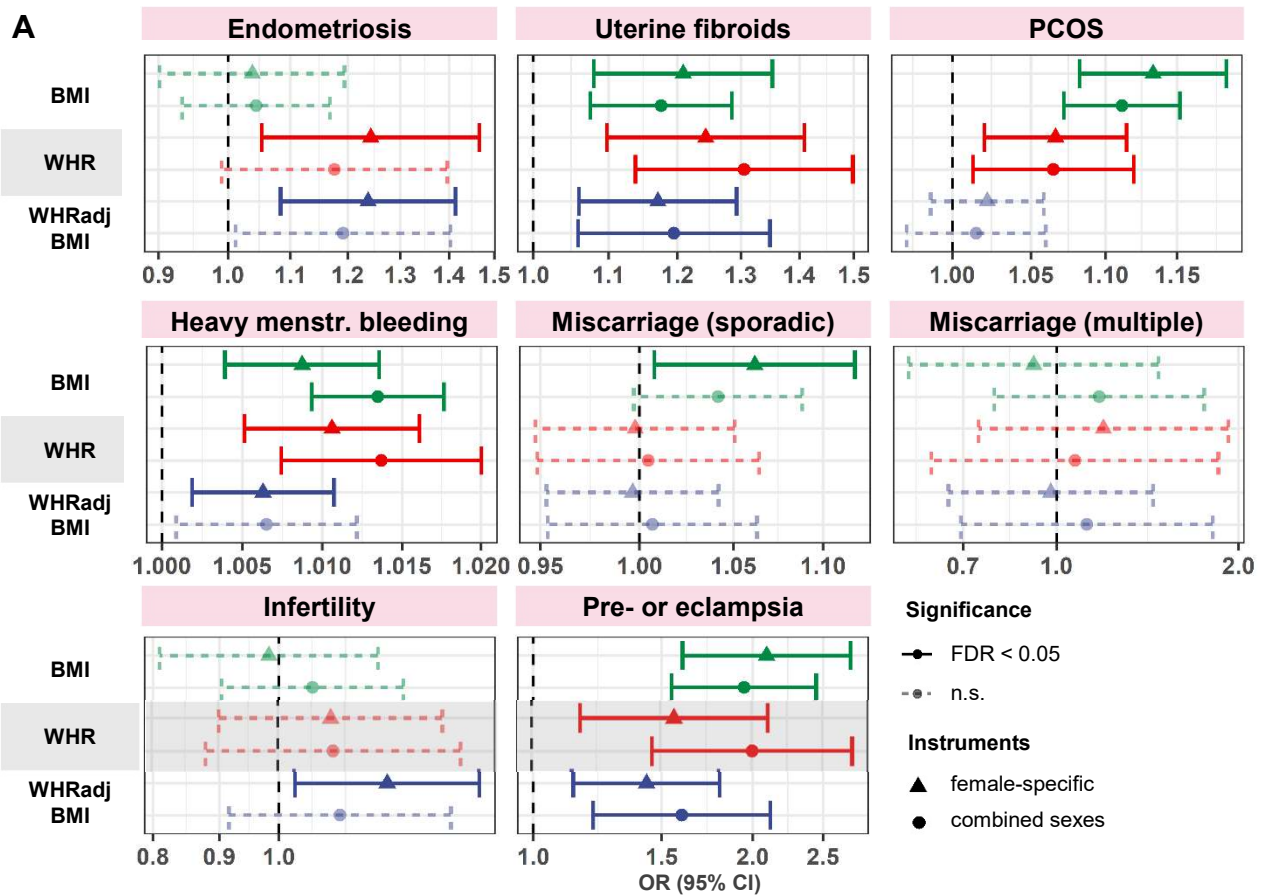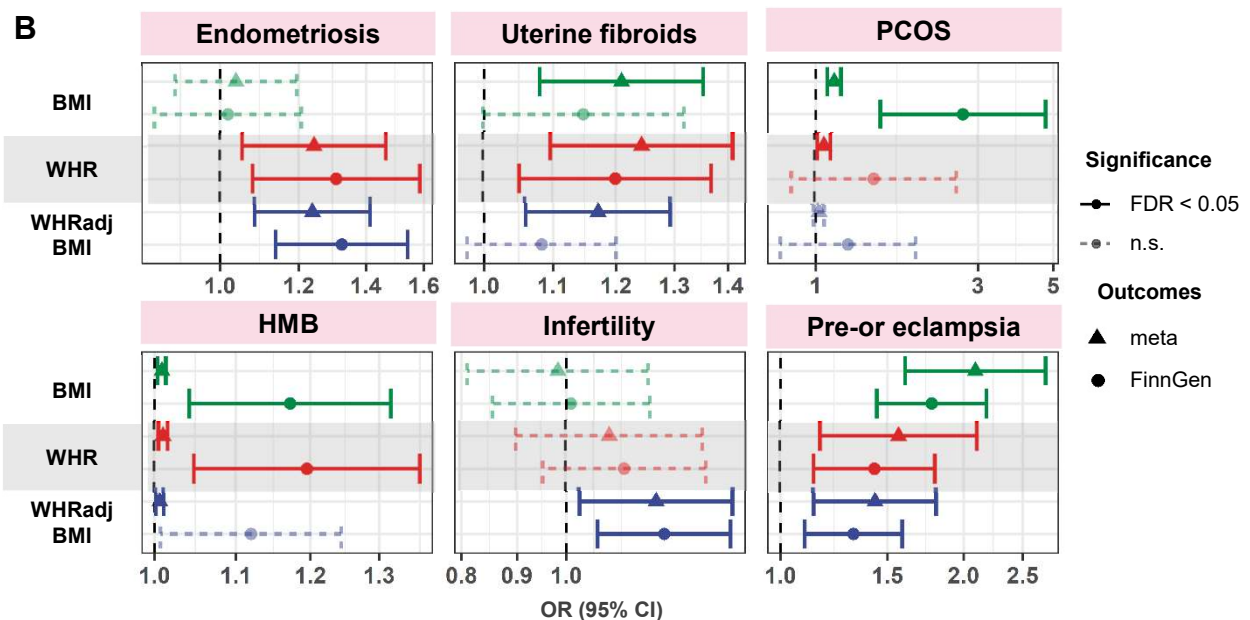

**S2 Figure. Mendelian randomisation sensitivity analyses for female reproductive disorders regressed on obesity traits. (A)** Female-specific genetic instruments vs combined-sexes genetic instruments. **(B)** Reproductive outcomes from meta-analysis of UKBB and FinnGen summary statistics vs those from FinnGen only. Summary statistics MR performed with TwoSampleMR R package and best method (displayed, IVW) chosen via Rucker's framework. Odds ratios (ORs) with 95% confidence intervals (CIs) displayed.
