# Supplementary material for: The role of obesity in female reproductive conditions: A Mendelian Randomisation study
Source: bioRxiv or medRxiv preprint supplement (doi:10.1101/2021.06.01.21257781), 2021-06-01
Supplement: Supplementary file [file media-5.pdf]

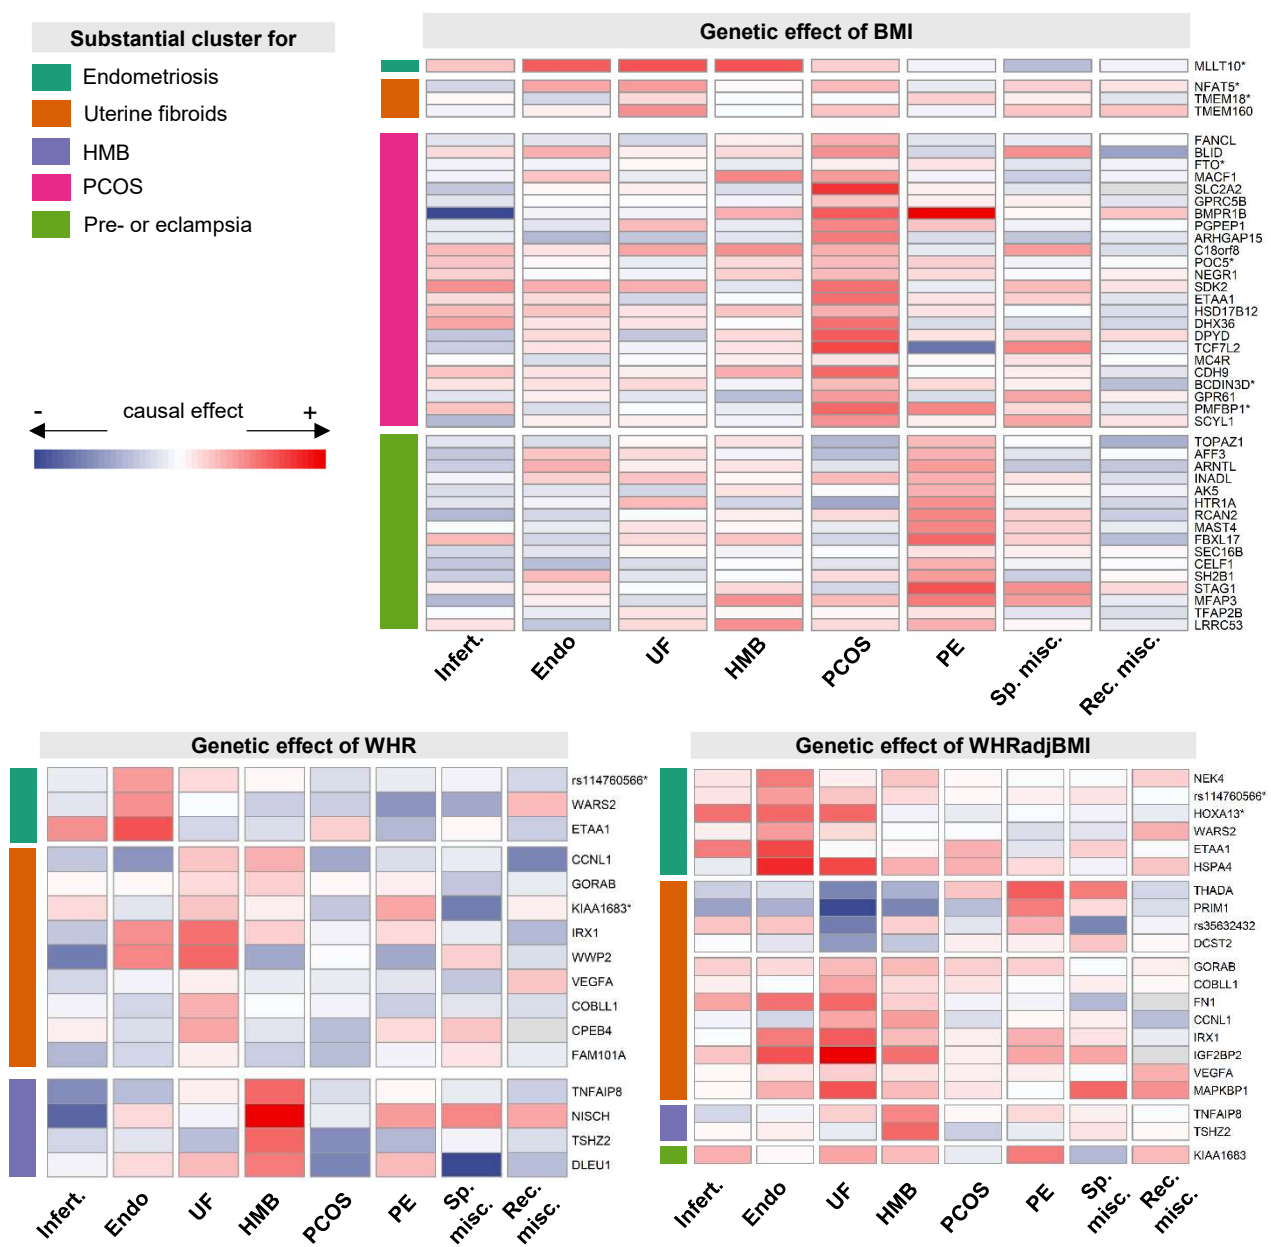

**S4 Figure. Single-SNP genetic effect estimates for obesity instruments on female reproductive disorders.** SNPs are annotated with their nearest gene by SNPsnap and clustered by obesity-female reproductive disorder relationship. SNPs with  $\geq 80\%$  probability of belonging to a substantial cluster (MRClust) are displayed, with an \* if the SNP belongs to substantial clusters for multiple disorders. Effect size estimates are scaled to a variance of 1 within each disease.
